# Supplementary material
Source: publisher site journal article supplement (https://www.spandidos-publications.com/2522/downloadSupplementary)
Supplement: Supplementary file 1 [file downloadSupplementary]

## Sheet: AM vs NC lncRNA in intestine 
ProbeName	p (Corr)	p	FC (abs)	Regulation	GeneID	GeneSymbol
NONMMUT073454	0.758738	0.0267631	12.381	up	NONMMUG045568.2	Tsix
ri|A530099A19|PX00660E12|1213	0.722638	0.00233877	5.73732	up	NA	NA
gi|755532494|ref|XR_871316.1|	0.785134	0.0490719	4.50457	up	105245081	LOC105245081
ri|B230219G19|PX00070I05|2499	0.758738	0.0259013	4.39229	up	NA	NA
NONMMUT044365	0.722638	0.00384875	4.10648	up	NONMMUG027379.2	NA
NONMMUT066764	0.72837	0.0117191	4.09069	up	NONMMUG041323.2	Gm15889
NONMMUT036798	0.722638	0.00348492	3.91998	up	NONMMUG022646.2	C230014O12Rik
NONMMUT066713	0.738028	0.017941	3.55261	up	NONMMUG041282.1	NA
ri|F630012J01|PL00014J06|2676	0.72837	0.00689583	3.44801	up	NA	NA
ri|E230032B21|PX00210M18|1295	0.738028	0.0178044	3.43655	up	NA	NA
ri|C730015M21|PX00685B15|3755	0.72837	0.00493508	3.37359	up	NA	NA
NONMMUT065663	0.776578	0.0392733	3.34864	up	NONMMUG040619.2	NA
NONMMUT026677	0.775478	0.0383619	3.19376	up	NONMMUG016535.2	NA
NONMMUT044376	0.785134	0.0466868	3.17581	up	NONMMUG027386.2	NA
ri|9230106C11|PX00061N16|2319	0.765576	0.0359267	3.05192	up	NA	NA
gi|568891772|ref|XR_402399.1|	0.72837	0.00697814	2.98921	up	102640735	Gm36732
gi|755532756|ref|XR_871427.1|	0.762346	0.030735	2.93542	up	105245099	LOC105245099
ENSMUST00000135553	0.762346	0.0279348	2.93489	up	ENSMUSG00000085659	Gm12325
NR_033303.1	0.745847	0.0202794	2.92807	up	109280	Slc22a13b-ps
NONMMUT071354	0.736888	0.0160062	2.85043	up	NONMMUG044200.2	NA
NONMMUT046052	0.752544	0.022316	2.84568	up	NONMMUG028432.2	NA
NONMMUT028949	0.72837	0.00800303	2.83581	up	NONMMUG017883.2	NA
gi|755552650|ref|XR_875497.1|	0.72837	0.00453645	2.80731	up	105245997	LOC105245997
ri|D230036K21|PX00189J19|2781	0.722638	0.00423224	2.7335	up	NA	NA
NONMMUT021457	0.785134	0.0466221	2.73241	up	NONMMUG013323.1	NA
ri|F730227K01|PL00020L01|1610	0.722638	0.00387379	2.72508	up	NA	NA
gi|755541992|ref|XR_381434.2|	0.72837	0.0113359	2.67152	up	102636165	Gm33308
NONMMUT055246	0.722638	0.0019775	2.66978	up	NONMMUG034307.1	NA
NONMMUT056550	0.72837	0.00595094	2.63377	up	NONMMUG035117.2	NA
NONMMUT016497	0.728658	0.0136048	2.57808	up	NONMMUG010367.2	NA
NONMMUT024235	0.762346	0.0280711	2.57171	up	NONMMUG014978.2	NA
NONMMUT004954	0.72837	0.00898157	2.51711	up	NONMMUG003183.1	NA
ri|C130033O04|PX00726A22|961	0.72837	0.00874463	2.49837	up	NA	NA
NONMMUT074297	0.722638	0.00431396	2.43105	up	NONMMUG046079.1	NA
NONMMUT035102	0.736888	0.0154636	2.37863	up	NONMMUG021623.2	NA
ri|B930095M22|PX00166I16|2680	0.783595	0.043677	2.36812	up	NA	NA
NONMMUT030429	0.73919	0.0187567	2.35402	up	NONMMUG018823.2	NA
gi|755508910|ref|XR_868021.1|	0.690763	0.00145322	2.32514	up	105244658	LOC105244658
gi|755540504|ref|XR_880008.1|	0.785134	0.0492276	2.31448	up	102638880	Gm35337
NONMMUT040618	0.72837	0.0090763	2.29544	up	NONMMUG025180.2	NA
NONMMUT033534	0.722638	0.00293273	2.29454	up	NONMMUG020637.2	NA
NONMMUT048751	0.722638	0.00362872	2.28494	up	NONMMUG030265.2	NA
NONMMUT022814	0.774299	0.0374208	2.28069	up	NONMMUG014103.2	NA
NONMMUT074385	0.73919	0.0192659	2.27467	up	NONMMUG046137.2	NA
ri|A430038O04|PX00135A20|1837	0.752544	0.0222627	2.26762	up	NA	NA
ri|C230048A08|PX00174N03|3754	0.72837	0.0118251	2.24968	up	NA	NA
ri|9330160J20|PX00652A06|1883	0.72837	0.0124579	2.22318	up	NA	NA
ri|A130099P19|PX00126N03|2964	0.621877	0.00030499	2.21033	up	NA	NA
NONMMUT030906	0.722638	0.00316635	2.20506	up	NONMMUG019058.2	NA
gi|568896880|ref|XR_392942.1|	0.748516	0.021162	2.19972	up	102632251	Gm16143
NONMMUT012980	0.731966	0.01456	11.3174	down	NONMMUG008238.2	NA
NONMMUT057158	0.72837	0.0119077	7.48212	down	NONMMUG035476.2	NA
NONMMUT025228	0.762346	0.027418	5.16634	down	NONMMUG015613.1	NA
NR_033472.1	0.72837	0.0106473	4.54964	down	100038628	Gm10768
NONMMUT063117	0.785134	0.0472288	4.30505	down	NONMMUG038962.2	NA
NONMMUT042367	0.736888	0.0156323	4.22661	down	NONMMUG026249.2	NA
NONMMUT073796	0.72837	0.0072804	4.11315	down	NONMMUG045761.2	Gm14950
NONMMUT064854	0.722638	0.00257946	3.71178	down	NONMMUG040048.2	Gm15305
NONMMUT050454	0.621877	0.000148871	3.69141	down	NONMMUG031258.2	Gm13120
ri|A230082G13|PX00130E08|1272	0.783505	0.0428839	3.63575	down	NA	NA
NONMMUT000795	0.774259	0.0373005	3.62115	down	NONMMUG000537.2	NA
NONMMUT063433	0.762346	0.029366	3.50894	down	NONMMUG039173.2	NA
ri|A730072G01|PX00151H04|1009	0.762346	0.0275968	3.44417	down	NA	NA
gi|755473636|ref|XR_886559.1|	0.785134	0.0474788	2.87083	down	105246748	LOC105246748
ri|D030043E24|PX00180H07|2670	0.785134	0.0490874	2.70687	down	NA	NA
ri|A530069H21|PX00142E16|4365	0.758738	0.02549	2.61388	down	NA	NA
gi|755488825|ref|XR_883619.1|	0.758738	0.0234287	2.60473	down	414073	BC040756
NONMMUT061713	0.784331	0.0449165	2.60317	down	NONMMUG038177.2	NA
NONMMUT041896	0.762346	0.0290432	2.55221	down	NONMMUG025934.2	NA
gi|568989581|ref|XR_383389.1|	0.765576	0.0358687	2.51136	down	102637183	Gm34060
NONMMUT020824	0.722638	0.00367265	2.48165	down	NONMMUG012958.2	NA
ri|C130087D21|PX00172M21|1788	0.72837	0.00700663	2.26807	down	NA	NA
NR_015521.1	0.72837	0.00718306	2.18439	down	69513	1700030C10Rik
NONMMUT045208	0.736888	0.0171738	2.08987	down	NONMMUG027889.1	NA
gi|755483297|ref|XR_866311.1|	0.748041	0.0205239	2.07149	down	105244174	LOC105244174
NONMMUT030064	0.730933	0.0143351	2.06269	down	NONMMUG018572.2	NA
NONMMUT066195	0.722638	0.00439726	2.04621	down	NONMMUG040968.2	NA
ri|C130093M03|PX00172K10|3359	0.72837	0.0124697	2.02243	down	NA	NA
NONMMUT051136	0.785134	0.0472359	1.98655	down	NONMMUG031691.2	NA
gi|755475696|ref|XR_402064.2|	0.72837	0.00749167	1.97701	down	102642196	LOC102642196
NONMMUT054866	0.73919	0.0186211	1.93425	down	NONMMUG034044.2	Gm16599
NONMMUT013579	0.778204	0.0404825	1.90582	down	NONMMUG008611.2	NA
ri|E860019P07|FX00002L11|3913	0.775478	0.0383532	1.89333	down	NA	NA
ENSMUST00000190769	0.758738	0.0240612	1.86555	down	ENSMUSG00000099449	Gm28401
NONMMUT021848	0.762346	0.0325665	1.85625	down	NONMMUG013562.2	NA
ri|B930059J09|PX00164P14|2089	0.736888	0.0162467	1.85514	down	NA	NA
ri|3230402A17|PX00010A04|2549	0.762346	0.0322172	1.85385	down	NA	NA
NONMMUT069782	0.762346	0.0316652	1.85077	down	NONMMUG043188.2	NA
gi|747165441|ref|NR_130645.1|	0.72837	0.010356	1.82982	down	71576	9130409J20Rik
gi|755521590|ref|XR_882095.1|	0.762346	0.0323778	1.82036	down	105247256	LOC105247256
gi|755552531|ref|XR_875418.1|	0.762346	0.0336804	1.81775	down	105243761	LOC105243761
NONMMUT061350	0.762346	0.0345058	1.81007	down	NONMMUG038101.2	NA
gi|755484146|ref|XR_394309.2|	0.72837	0.013129	1.80159	down	102642189	LOC102642189
NONMMUT028969	0.784331	0.0452908	1.80084	down	NONMMUG017900.2	Gm16191
NONMMUT063219	0.72837	0.0132725	1.78343	down	NONMMUG039039.2	NA
gi|755549438|ref|XR_874564.1|	0.72837	0.0091222	1.78192	down	105245739	LOC105245739
NONMMUT037438	0.758738	0.0258219	1.77486	down	NONMMUG023088.1	NA
gi|755512090|ref|XR_868474.1|	0.72837	0.00799016	1.77095	down	105244764	LOC105244764
NONMMUT021807	0.783505	0.0429023	1.76567	down	NONMMUG013550.2	NA
NONMMUT053122	0.762346	0.0343444	1.75769	down	NONMMUG032994.1	NA

## Sheet: H-CP vs AM lncRNA in intestine
ProbeName	p (Corr)	p	FC (abs)	Regulation	GeneID	GeneSymbol
NONMMUT025228	0.413719	0.00707428	4.13179	up	NONMMUG015613.1	NA
NONMMUT057158	0.474622	0.0161932	3.92959	up	NONMMUG035476.2	NA
NR_033472.1	0.516602	0.0281077	3.62641	up	100038628	Gm10768
gi|755544003|ref|XR_873103.1|	0.408047	0.00632506	2.7185	up	105245165	LOC105245165
ri|7120492J04|PX00321I19|2517	0.332089	0.000866439	2.68582	up	NA	NA
NONMMUT055965	0.40525	0.00604775	2.66056	up	NONMMUG034764.1	NA
gi|755473636|ref|XR_886559.1|	0.490633	0.0211883	2.6508	up	105246748	LOC105246748
NONMMUT057315	0.390813	0.00331188	2.51314	up	NONMMUG035584.2	NA
NONMMUT061628	0.516602	0.0282588	2.41265	up	NONMMUG038156.2	NA
NONMMUT055963	0.489312	0.0206787	2.39243	up	NONMMUG034763.1	NA
NONMMUT043476	0.513292	0.0253443	2.32414	up	NONMMUG026855.1	NA
NONMMUT012712	0.413719	0.00784988	2.30569	up	NONMMUG008073.2	NA
NONMMUT022804	0.517617	0.0287266	2.30504	up	NONMMUG014095.1	NA
NONMMUT047713	0.485332	0.0197629	2.2867	up	NONMMUG029560.1	NA
NONMMUT061652	0.513292	0.0260267	2.26836	up	NONMMUG038156.2	NA
NONMMUT035479	0.484445	0.0187838	2.21775	up	NONMMUG021871.1	NA
NONMMUT018541	0.419107	0.00890523	2.19221	up	NONMMUG011523.1	NA
NONMMUT051538	0.332089	0.000168309	2.16711	up	NONMMUG031961.2	Gm15589
NONMMUT043477	0.36537	0.00188598	2.14143	up	NONMMUG026856.1	NA
NONMMUT066413	0.413846	0.00829813	2.13444	up	NONMMUG041110.1	NA
NONMMUT061187	0.396034	0.00439043	2.12222	up	NONMMUG037997.2	0610005C13Rik
gi|755505148|ref|XR_375761.2|	0.523795	0.0310461	2.11727	up	102633077	Gm30991
ri|C330004M20|PX00075N03|978	0.55758	0.044451	2.1113	up	NA	NA
gi|755554445|ref|XR_384721.2|	0.386794	0.00261196	2.05217	up	102639174	Gm35545
ri|C130093M03|PX00172K10|3359	0.416324	0.00870444	2.04952	up	NA	NA
ri|4732442J12|PX00051O23|2580	0.396034	0.00411947	2.03033	up	NA	NA
ri|F530001B17|PS00005E07|2687	0.466464	0.0150806	2.02528	up	NA	NA
NONMMUT053122	0.460168	0.013914	2.01991	up	NONMMUG032994.1	NA
NONMMUT057993	0.396034	0.00466729	2.0115	up	NONMMUG036016.2	NA
NONMMUT060068	0.513292	0.0252144	1.9965	up	NONMMUG037323.1	NA
ri|B730007O14|PX00329O09|1749	0.416087	0.00853614	1.99235	up	NA	NA
ri|2010306N10|ZX00047K12|1028	0.46383	0.0144509	1.98112	up	NA	NA
ri|B930029J24|PX00725B20|3477	0.386794	0.00245601	1.97896	up	NA	NA
NONMMUT029257	0.474622	0.0164701	1.97736	up	NONMMUG018088.2	NA
NONMMUT052006	0.534424	0.033517	1.96314	up	NONMMUG032253.2	NA
ri|8430415O14|PX00024K14|594	0.489312	0.0204204	1.9462	up	NA	NA
ri|4733401O12|PX00713B14|1989	0.416324	0.00868471	1.93889	up	NA	NA
NONMMUT071428	0.426875	0.00918971	1.93455	up	NONMMUG044258.1	NA
NONMMUT032431	0.432569	0.00983946	1.9281	up	NONMMUG019976.2	NA
NONMMUT016492	0.556481	0.0426914	1.92448	up	NONMMUG010362.2	NA
NONMMUT013553	0.520141	0.0300628	1.91198	up	NONMMUG008595.2	NA
NONMMUT016723	0.390813	0.00327117	1.89517	up	NONMMUG010528.2	NA
ri|A430071F24|PX00137B05|2564	0.413719	0.00812244	1.88709	up	NA	NA
ri|9230119G06|PX00718G19|2174	0.396034	0.00532926	1.88661	up	NA	NA
ri|A130083C04|PX00125M12|2434	0.541234	0.0361678	1.88582	up	NA	NA
ri|F830020F09|PL00006E11|3119	0.540048	0.0355066	1.88511	up	NA	NA
gi|755477693|ref|XR_861792.1|	0.465487	0.0146775	1.87494	up	102640846	Gm36816
NONMMUT051136	0.517001	0.0284132	1.87451	up	NONMMUG031691.2	NA
NONMMUT020438	0.435079	0.0103096	1.86773	up	NONMMUG012689.2	NA
NONMMUT035477	0.396034	0.00378898	1.85771	up	NONMMUG021869.1	NA
NONMMUT044844	0.332089	0.000584787	351.818	down	NONMMUG027694.1	NA
NONMMUT056114	0.409953	0.00673378	88.6202	down	NONMMUG034863.1	NA
NONMMUT044842	0.332089	0.000810178	69.2089	down	NONMMUG027692.2	Amy2-ps1
NONMMUT012860	0.38315	0.00228628	13.4313	down	NONMMUG008163.2	BC018473
ri|F830017C03|PM00023H14|1346	0.386794	0.00284985	6.52497	down	NA	NA
NONMMUT039267	0.38315	0.00218385	5.05643	down	NONMMUG024264.2	NA
NONMMUT036798	0.442102	0.0112946	4.39294	down	NONMMUG022646.2	C230014O12Rik
gi|755475303|ref|XR_401806.2|	0.396034	0.00420081	4.17871	down	102637171	Gm34053
NONMMUT008568	0.460147	0.0135504	3.88319	down	NONMMUG005298.2	NA
NONMMUT029142	0.544951	0.0381317	3.73107	down	NONMMUG018021.2	NA
gi|755474448|ref|XR_887207.1|	0.396034	0.00484521	3.72373	down	105247593	LOC105247593
NONMMUT044365	0.460147	0.013296	3.72148	down	NONMMUG027379.2	NA
gi|755549719|ref|XR_874755.1|	0.452337	0.0125849	3.6443	down	102633392	Gm31227
gi|755552650|ref|XR_875497.1|	0.513292	0.0256748	3.55133	down	105245997	LOC105245997
ri|D230036K21|PX00189J19|2781	0.484964	0.0194141	3.43134	down	NA	NA
NONMMUT029144	0.549821	0.0397073	3.33832	down	NONMMUG018022.2	NA
ri|F730227K01|PL00020L01|1610	0.460168	0.0137252	3.20622	down	NA	NA
NONMMUT024235	0.539362	0.035155	3.19485	down	NONMMUG014978.2	NA
gi|755472672|ref|XR_885963.1|	0.386794	0.00306074	3.1947	down	105244225	LOC105244225
NONMMUT073991	0.557973	0.0448182	3.12472	down	NONMMUG045877.2	Gm14999
gi|568891772|ref|XR_402399.1|	0.445524	0.0117037	3.04547	down	102640735	Gm36732
NONMMUT019221	0.428256	0.00952659	2.97847	down	NONMMUG011905.1	NA
NONMMUT030906	0.386794	0.00240856	2.90653	down	NONMMUG019058.2	NA
ri|F630113P07|PS00011B15|1744	0.542416	0.0370138	2.8327	down	NA	NA
NONMMUT046052	0.428143	0.00944569	2.80334	down	NONMMUG028432.2	NA
NONMMUT051219	0.0152403	4.7482e-07	2.71092	down	NONMMUG031744.2	Gm15734
ri|G370060F12|FL00003H11|3004	0.357489	0.00129767	2.66844	down	NA	NA
NONMMUT066764	0.474622	0.0160042	2.65409	down	NONMMUG041323.2	Gm15889
gi|755541992|ref|XR_381434.2|	0.460168	0.0138793	2.63962	down	102636165	Gm33308
NONMMUT046055	0.519013	0.0290149	2.53973	down	NONMMUG028432.2	NA
ENSMUST00000154242	0.396034	0.00405302	2.52789	down	ENSMUSG00000085385	Snhg17
NONMMUT029079	0.413846	0.0083297	2.46341	down	NONMMUG017974.2	NA
NONMMUT056550	0.396034	0.00445349	2.44347	down	NONMMUG035117.2	NA
gi|755520442|ref|XR_881927.1|	0.541855	0.0362822	2.43925	down	233045	Gm26604
gi|568896880|ref|XR_392942.1|	0.413719	0.00766139	2.429	down	102632251	Gm16143
NONMMUT043964	0.470658	0.0155337	2.40318	down	NONMMUG027128.2	AC171273.1
ri|A530099A19|PX00660E12|1213	0.490633	0.0211658	2.39613	down	NA	NA
NONMMUT051570	0.567204	0.0476937	2.3897	down	NONMMUG031982.2	NA
gi|755481867|ref|XR_392752.2|	0.569815	0.0492055	2.33685	down	102635880	Gm33104
ri|I420016L07|PL00044K05|2345	0.460147	0.013078	2.3326	down	NA	NA
ri|A130055N14|PX00123J04|2209	0.332089	0.000580248	2.32429	down	NA	NA
ri|I1C0047G23|FU00006O18|1693	0.386794	0.0028661	2.28221	down	NA	NA
gi|755476807|ref|XR_888673.1|	0.428143	0.00941446	2.25856	down	105247673	LOC105247673
ri|G630004P10|PL00012O20|1115	0.556481	0.0431392	2.24332	down	NA	NA
ri|B830041H04|PX00695H02|3571	0.452491	0.0126109	2.23535	down	NA	NA
ri|E130309C16|PX00675O16|2969	0.360338	0.00152234	2.22108	down	NA	NA
gi|755480465|ref|XR_863593.1|	0.413351	0.00689159	2.20419	down	105243282	LOC105243282
NONMMUT013822	0.396034	0.00517189	2.20298	down	NONMMUG008738.2	NA
NONMMUT058385	0.54395	0.037739	2.18204	down	NONMMUG036274.2	NA
ri|C730015M21|PX00685B15|3755	0.478641	0.0170985	2.13482	down	NA	NA

## Sheet: mRNAs in intestine, AM vs NC
Probe name	P-value (Corr)	P-value	FC (abs)	Regulation	Gene symbol
A_51_P140429	0.202667	0.0124712	68.0821	up	Zg16
A_55_P2005956	0.305825	0.0469718	59.2309	up	Egfbp2
A_55_P2025006	0.306097	0.0473356	57.9547	up	Klk1b26
A_51_P380078	0.18153	0.00817452	52.3281	up	Fcgbp
A_51_P423813	0.248245	0.0242202	43.8528	up	Alpi
A_55_P2111163	0.130914	0.00209624	42.2517	up	S100g
A_52_P578634	0.249912	0.0247288	40.9736	up	Cela1
A_55_P2013236	0.129651	0.00180208	39.1029	up	S100g
A_66_P100937	0.0675405	2.63171e-05	35.5087	up	LOC102642338
A_52_P307904	0.209166	0.0146332	28.4641	up	Gpr128
A_55_P1995350	0.129651	0.00171627	26.1368	up	Btnl1
A_55_P2131725	0.230885	0.0199628	22.4976	up	LOC100045026
A_55_P2144686	0.206355	0.0137054	21.3191	up	Dmbt1
A_55_P1966862	0.197145	0.0110451	15.8333	up	Prss32
A_55_P1995337	0.241556	0.0223419	14.4736	up	Btnl5-ps
A_51_P313581	0.268448	0.0319026	10.8344	up	Fabp2
A_51_P239737	0.15092	0.00393798	10.51	up	Pigr
A_52_P31510	0.310473	0.0496623	9.85459	up	Pdx1
A_66_P111021	0.25886	0.0276515	7.17924	up	Nlrp6
A_55_P2047431	0.252661	0.025515	6.96079	up	Il22ra1
A_51_P464394	0.209166	0.0144598	6.40734	up	Klb
A_51_P425824	0.0991258	0.000214204	6.28936	up	Fam132a
A_55_P2039225	0.212563	0.0155181	6.11157	up	Rap1gap
A_55_P2076846	0.303227	0.0459686	5.89238	up	Tead2
A_55_P2068096	0.225295	0.018554	5.64384	up	Rap1gap
A_52_P570266	0.0991258	0.00023135	5.09557	up	Psmb10
A_51_P451957	0.302439	0.0456146	5.03896	up	Cpne6
A_52_P357992	0.233057	0.020387	5.03847	up	Ms4a12
A_55_P2114959	0.24793	0.0241394	4.84141	up	Btnl1
A_55_P2085142	0.209166	0.0146285	4.73699	up	Spp1
A_55_P2074656	0.272636	0.0335961	4.57757	up	Padi2
A_51_P258710	0.179598	0.00765063	4.42574	up	4930415O20Rik
A_55_P2208579	0.265756	0.0300676	4.39794	up	Onecut2
A_55_P2129886	0.254079	0.0260832	4.20988	up	Btnl5-ps
A_55_P2091359	0.294155	0.0420011	4.19793	up	Padi2
A_52_P436447	0.159439	0.00480596	3.97202	up	Slc25a35
A_55_P2022890	0.195141	0.0105105	3.85728	up	Slc12a8
A_55_P1971006	0.163596	0.00528147	3.78375	up	Urah
A_55_P2174582	0.232758	0.020265	3.72476	up	Urah
A_55_P2386236	0.255037	0.0262465	3.68298	up	Ceacam2
A_55_P2123939	0.25894	0.0276729	3.62004	up	Tmc5
A_52_P574759	0.282867	0.0374768	3.60456	up	Rbpjl
A_55_P2110497	0.269295	0.0323162	3.56474	up	Ddc
A_52_P515826	0.256813	0.0268993	3.5453	up	Med13
A_55_P1958200	0.296922	0.0431862	3.46287	up	P2rx1
A_55_P2031403	0.195918	0.0106927	3.46064	up	Smim24
A_55_P1966660	0.165957	0.00591025	3.45883	up	LOC547349
A_51_P102438	0.201057	0.0119767	3.34917	up	Ugt2b36
A_55_P1995339	0.27283	0.0336621	3.34224	up	Btnl6
A_55_P2087923	0.241648	0.0225008	3.25294	up	Otud3
A_55_P2135153	0.163596	0.00528423	15.6745	down	Obp2a
A_51_P126275	0.193862	0.0102099	10.2625	down	Krt6b
A_55_P2294059	0.10145	0.000417924	8.04879	down	2900035I09Rik
A_55_P1961873	0.253204	0.0256959	7.56411	down	Akt3
A_51_P266248	0.275757	0.0348526	6.26373	down	Ighv14-2
A_51_P410681	0.127323	0.00135048	5.95858	down	Irx5
A_51_P269404	0.129651	0.00149822	5.26205	down	Fmo3
A_55_P2125154	0.20085	0.0119356	5.09691	down	Gm5476
A_55_P2006261	0.253875	0.0260189	4.99368	down	Krt15
A_55_P1985239	0.260228	0.028097	4.92368	down	Necab1
A_55_P2144716	0.283776	0.0379909	4.91395	down	Hecw2
A_51_P135268	0.183599	0.00862882	4.83324	down	Corin
A_55_P2270437	0.198439	0.0112619	4.75384	down	4930528J11Rik
A_55_P2394308	0.169139	0.00641837	4.47741	down	Fst
A_51_P173678	0.268448	0.0317522	4.27954	down	Slc10a6
A_51_P159453	0.274967	0.0343758	4.25255	down	Serpina3n
A_55_P2142222	0.27283	0.0337243	4.21624	down	Serpina3h
A_55_P2085641	0.31058	0.0497645	4.05674	down	Lmbr1l
A_55_P2183979	0.263699	0.029302	3.98968	down	Pak7
A_55_P2072576	0.108271	0.000636639	3.95371	down	Pcdhb12
A_51_P454190	0.253875	0.0260218	3.81793	down	Hecw2
A_51_P153063	0.305968	0.0471443	3.81632	down	Fabp12
A_55_P2060249	0.149885	0.00382565	3.81464	down	Catsperb
A_55_P1989663	0.15636	0.00449766	3.58246	down	Slco3a1
A_55_P1997948	0.10684	0.00048297	3.57188	down	Smek2
A_55_P1996489	0.18562	0.00899202	3.56379	down	Gm10926
A_55_P2087911	0.301664	0.0450077	3.56152	down	Mthfsd
A_55_P1993180	0.151238	0.00406607	3.50636	down	Speer4c
A_55_P2090205	0.0956564	9.41269e-05	3.49411	down	Tpm3
A_51_P376741	0.12467	0.00121256	3.4464	down	4933402J07Rik
A_55_P2121744	0.172826	0.0067446	3.43712	down	Vars2
A_66_P121205	0.129651	0.00159494	3.42049	down	Olfr312
A_51_P100309	0.260552	0.0284296	3.41296	down	Oprm1
A_55_P2007243	0.207602	0.0140059	3.40179	down	Kcnc1
A_55_P2077278	0.189625	0.00966078	3.40079	down	Arid3c
A_55_P2040485	0.296922	0.0431208	3.38441	down	Ms4a4a
A_55_P2106039	0.146512	0.00356268	3.35507	down	Map3k6
A_55_P2308488	0.27825	0.0356898	3.3524	down	Tiam1
A_51_P483473	0.240164	0.0220841	3.31275	down	St3gal5
A_52_P71686	0.242269	0.0227389	3.3107	down	Atp6v0d2
A_55_P1987694	0.260819	0.0285054	3.31041	down	Ptprd
A_51_P331059	0.248443	0.0243274	3.29842	down	Tex15
A_52_P104658	0.181305	0.00808746	3.29654	down	Krt6a
A_55_P1988183	0.309881	0.0491411	3.27666	down	Cdkn2b
A_51_P164393	0.228211	0.0193805	3.27071	down	Txndc2
A_55_P2006035	0.129651	0.00148416	3.24398	down	Galnt15
A_51_P279038	0.214292	0.0157748	3.21972	down	Ppargc1a
A_55_P2006615	0.236662	0.0213153	3.21251	down	Rbbp9
A_55_P1980471	0.181213	0.00786063	3.19991	down	Grin3a
A_55_P1958652	0.130637	0.00189425	3.1982	down	Arf2

## Sheet: H-CP vs AM mRNA in intestine
Table SIV. List of the top 50 up- and downregulated lncRNAs and mRNAs between the AM and NC groups, and between the H-CP and AM groups in the intestine.
ProbeName	p (Corr)	p	FC (abs)	Regulation	GeneSymbol
A_55_P2024155	0.722638	0.00265299	9.57423	up	Zbtb16
A_51_P279693	0.762514	0.0349743	8.45625	up	Cyp1a1
A_51_P378789	0.72837	0.00947231	4.57905	up	Cxcl13
A_55_P2038358	0.752459	0.0221622	3.75244	up	Acot1
A_55_P2001780	0.785134	0.046478	3.7335	up	Cyp3a41b
A_55_P2072453	0.785134	0.0461379	3.57584	up	1-Mar
A_51_P100309	0.691103	0.00171645	3.41594	up	Oprm1
A_55_P2269819	0.738768	0.0184165	3.10818	up	Fam107a
A_52_P525183	0.72837	0.0114818	3.07158	up	Acot2
A_51_P327934	0.736888	0.0152944	3.04272	up	Rfx2
A_51_P247496	0.621877	0.000681362	2.99113	up	Gm9767
A_55_P2171116	0.762346	0.0291518	2.86538	up	Lgals3
A_55_P1952399	0.783595	0.0437749	2.81274	up	Cyp4a31
A_52_P223224	0.73919	0.0190757	2.7961	up	Hsd17b11
A_55_P2107987	0.72837	0.0111045	2.78693	up	Slc22a13b-ps
A_55_P2058908	0.748516	0.0213396	2.7312	up	Gphb5
A_55_P1987620	0.762346	0.0305682	2.72625	up	Cyp4a32
A_55_P2109033	0.783595	0.0433953	2.71947	up	Hmgcs2
A_52_P308875	0.754002	0.0227365	2.66751	up	Apobec3
A_55_P2092030	0.779836	0.0422266	2.66054	up	Cyp4a10
A_55_P2142146	0.758738	0.0256167	2.62016	up	Glul
A_55_P2099279	0.72837	0.00611127	2.5496	up	Tmem29
A_51_P281089	0.762346	0.0322312	2.53818	up	S100a6
A_55_P2094262	0.722638	0.00275648	2.47909	up	Tph1
A_51_P261999	0.722638	0.00253815	2.43067	up	Ccdc166
A_55_P1997421	0.785134	0.0455346	2.42901	up	Gm5416
A_51_P206165	0.752294	0.0219586	2.32601	up	9130230L23Rik
A_55_P1960748	0.731966	0.0146707	2.27231	up	Arl13b
A_51_P260683	0.785134	0.0479991	2.26076	up	Rgs1
A_55_P1957213	0.762346	0.0287169	2.25893	up	3930401B19Rik
A_51_P375969	0.776578	0.0388582	2.23812	up	Ces1d
A_51_P386539	0.762346	0.0275837	2.21423	up	Rnf125
A_55_P2029574	0.781844	0.0424687	2.19438	up	Por
A_55_P2016540	0.736888	0.0151545	2.18562	up	Cry2
A_55_P2032659	0.748528	0.0214996	2.13808	up	Tox
A_51_P436790	0.736888	0.0167225	2.10413	up	Olfr1537
A_55_P2266744	0.748516	0.0213932	2.10311	up	B930095M22Rik
A_51_P209122	0.762346	0.0335643	2.09442	up	Agr2
A_55_P2181538	0.776578	0.0389084	2.07606	up	Sult1d1
A_51_P496432	0.762346	0.0286289	2.07156	up	Acsl1
A_55_P1980401	0.72837	0.00611938	2.06696	up	Cbx7
A_55_P1990505	0.784331	0.0447351	2.05746	up	Masp2
A_55_P1985433	0.72837	0.00830243	2.04857	up	Nrg1
A_55_P2184364	0.765576	0.0357381	2.02597	up	B4galt3
A_51_P245796	0.72837	0.004801	2.00507	up	Ddit4
A_55_P2322709	0.722638	0.002438	1.99844	up	4633401B06Rik
A_55_P2229244	0.72837	0.0123969	1.98746	up	E430022K19Rik
A_51_P430900	0.722638	0.00429751	1.97194	up	Dusp1
A_52_P625683	0.762346	0.0295687	1.96177	up	Pxmp4
A_55_P1969131	0.783595	0.0431967	1.9505	up	Cidec
A_52_P311519	0.621877	0.000922585	32.9152	down	Plb1
A_55_P1967643	0.621877	0.000379431	28.6646	down	Plb1
A_55_P1999653	0.776578	0.0388478	8.71536	down	Enpp7
A_51_P129731	0.72837	0.0111875	6.6516	down	Tmigd1
A_55_P2118916	0.72837	0.00602873	5.81963	down	Mgat4c
A_52_P239086	0.72837	0.0120353	5.36826	down	Apol10a
A_66_P127161	0.722638	0.0021705	3.8959	down	Cyp2u1
A_55_P2094916	0.758738	0.0257059	3.42965	down	Ocm
A_55_P1960117	0.72837	0.012755	3.3282	down	1190002N15Rik
A_55_P2073825	0.736888	0.0175009	3.201	down	Ocm
A_55_P2011385	0.621877	0.000119418	3.19618	down	Tifa
A_55_P2081050	0.752294	0.0219628	3.07816	down	Kcnj13
A_51_P403477	0.752544	0.0225202	3.07548	down	Dio1
A_55_P2142695	0.730933	0.0142067	3.05406	down	E330014E10Rik
A_52_P98778	0.731966	0.0146718	2.96372	down	Ang4
A_55_P1975874	0.776578	0.0386064	2.88539	down	Bcl2l15
A_55_P1963553	0.72837	0.00548325	2.84681	down	Vmn1r174
A_55_P2118515	0.72837	0.0108441	2.84564	down	Gm20837
A_51_P425824	0.784331	0.0452275	2.74274	down	Fam132a
A_55_P2157902	0.72837	0.0133405	2.7393	down	Igsf10
A_51_P349888	0.730933	0.0140412	2.61552	down	Ang2
A_51_P179504	0.736888	0.0155044	2.60339	down	Ang3
A_55_P2063880	0.762346	0.0347438	2.5195	down	C7
A_55_P1971928	0.778204	0.0414242	2.45281	down	Defa21
A_55_P1988804	0.72837	0.00870548	2.43793	down	Stom
A_55_P2003603	0.736888	0.015958	2.32064	down	Slc2a7
A_55_P1977038	0.72837	0.00644067	2.24658	down	Cxcl9
A_55_P2085270	0.738768	0.0182971	2.21169	down	2010007E15Rik
A_51_P515605	0.762346	0.0338846	2.18073	down	Col3a1
A_51_P136888	0.762346	0.0344943	2.15557	down	Rb1
A_66_P101879	0.72837	0.00588675	2.12138	down	Cyp2u1
A_51_P294807	0.72837	0.00540381	2.08182	down	Stom
A_55_P2046605	0.72837	0.00911524	2.05919	down	1700030C10Rik
A_51_P303061	0.72837	0.00594394	2.05181	down	Adcy8
A_55_P2080774	0.73919	0.0192141	2.05068	down	Qdpr
A_55_P2022812	0.762183	0.0271922	2.0489	down	Cyp4f17
A_55_P1993263	0.676691	0.00140384	2.02606	down	Chic1
A_55_P2138781	0.72837	0.0107257	2.02485	down	Efnb2
A_52_P416280	0.758738	0.0266055	2.0172	down	Enpp6
A_55_P1974760	0.775478	0.0381674	1.95844	down	Duox2
A_55_P2038139	0.621877	0.000252573	1.9065	down	Ptprj
A_55_P2011387	0.722638	0.00275512	1.88528	down	Tifa
A_52_P471535	0.758738	0.0264448	1.87528	down	Ccdc116
A_55_P1990346	0.778204	0.0409553	1.8729	down	Adamdec1
A_55_P1961407	0.778204	0.0407919	1.86236	down	Defa2
A_55_P2205858	0.752459	0.0220822	1.84342	down	Col6a5
A_55_P2315012	0.736888	0.0156006	1.81866	down	4930458D05Rik
A_55_P2118173	0.778204	0.0415357	1.81804	down	Igf2
A_52_P35048	0.762346	0.0310405	1.81363	down	Serpinf1
A_55_P2060158	0.783595	0.0434077	1.81017	down	Ermn
